# Supplementary material for: First Report of Rubber Collection Bowls & Plastic and Bamboo Water Containers as the Major Breeding Source of Ae. albopictus with the Indigenous Transmission of Dengue and Chikungunya in Rural Forested Malaria-Endemic Villages of Dhalai District, Tripura, India: The Importance of Molecular Identification
Source: MDPI journal article supplement (doi:10.3390/biomedicines11082186), 2023-08-03
Supplement: s1 [file s1]

**Table S2: Diversity and neutrality indices for *Ae. albopictus* global populations based on COI gene**  
(N=number of sequences, H=number of haplotype, Hd=Haplotype diversity, S=number of segregating sites, k=average number of nucleotide differences, Pi=nucleotide diversity per site, NA=not applicable (only 1 haplotype is present) \*p=statistically significant. Populations with less than 4 sequence were excluded from this calculation.)

| Population          | N  | S | H  | Hd    | Pi      | K     | Tajima's D         | Fu Li's D        | Fu Li's F          |
|---------------------|----|---|----|-------|---------|-------|--------------------|------------------|--------------------|
| Tripura(This study) | 10 | 5 | 6  | 0.867 | 0.00246 | 1.511 | -0.58152, P > 0.10 | -1.511, P > 0.10 | -0.74018, P > 0.10 |
| Laos                | 17 | 6 | 7  | 0.794 | 0.00196 | 1.206 | -1.07510, P > 0.10 | -1.418, P > 0.10 | -1.52235, P > 0.10 |
| Thailand            | 23 | 9 | 11 | 0.885 | 0.00295 | 1.810 | -0.85358, P > 0.10 | -0.242, P > 0.10 | -0.49040, P > 0.10 |
| Malaysia            | 8  | 2 | 3  | 0.607 | 0.00111 | 0.679 | -0.44794, P > 0.10 | -0.149, P > 0.10 | -0.23785, P > 0.10 |
| Spain               | 13 | 0 | 1  | NA    | NA      | NA    | NA                 | NA               | NA                 |
| Brazil              | 7  | 0 | 1  | NA    | NA      | NA    | NA                 | NA               | NA                 |
| Cameroon            | 6  | 5 | 3  | 0.733 | 0.00434 | 2.667 | 1.21883, P > 0.10  | 0.938, P > 0.10  | 1.06342, P > 0.10  |
| Cambodia            | 6  | 3 | 3  | 0.733 | 0.00239 | 1.467 | 0.60031, P > 0.10  | 0.510, P > 0.10  | 0.55663, P > 0.10  |
| China               | 4  | 1 | 2  | 0.667 | 0.00109 | 0.667 | 1.63299, P > 0.10  | 1.632, P > 0.10  | 1.276, P > 0.10    |
