# Supplementary material for: First Report of Rubber Collection Bowls & Plastic and Bamboo Water Containers as the Major Breeding Source of Ae. albopictus with the Indigenous Transmission of Dengue and Chikungunya in Rural Forested Malaria-Endemic Villages of Dhalai District, Tripura, India: The Importance of Molecular Identification
Source: MDPI journal article supplement (doi:10.3390/biomedicines11082186), 2023-08-03
Supplement: s1 [file s1]

**Table S1:** Isolates of the study with respect to the container and area.

| <b>Accession No:</b> | <b>Container</b>       | <b>Area</b> |
|----------------------|------------------------|-------------|
| ON854152             | Water drum             | Satiram     |
| ON854153             | Chips packet           | Tilakkumar  |
| OP503384             | Pond                   | Tilakkumar  |
| OP503385             | Rubber collection bowl | Ranasai     |
| OP503386             | Rubber collection bowl | Ranasai     |
| OP503387             | Light trap collection  | Dongkarai   |
| OP503388             | Light trap collection  | Satiram     |
| OP503389             | Light trap collection  | Ranasai     |
| OP503390             | Plastic bucket         | Ranasai     |
| OP503391             | Rubber collection bowl | Ranasai     |
| ON849338             | Bamboo stump           | Tamarai     |
| OP503895             | Rubber collection bowl | Ranasai     |
